# Supplementary material for: Human disease locus discovery and mapping to molecular pathways through phylogenetic profiling
Source: PubMed Central journal article supplement — Mol Syst Biol. 2013 Oct 1;9:692. doi: 10.1038/msb.2013.50 (PMC3817400; doi:10.1038/msb.2013.50), 2013-10-01
Supplement: msb201350-s1.pdf [file msb201350-s1.pdf]

# Supplementary Information

## **Human disease locus discovery and mapping to molecular pathways through phylogenetic profiling**

Yuval Tabach<sup>1,2</sup>, Tamar Golan<sup>3</sup>, Abrahan Hernández-Hernández<sup>4</sup>, Arielle R. Messer<sup>3</sup>, Tomoyuki Fukuda<sup>4</sup>, Anna Kouznetsova<sup>4</sup>, Jian-Guo Liu<sup>4</sup>, Ingrid Lilienthal<sup>4</sup>, Carmit Levy<sup>3\*</sup>, Gary Ruvkun<sup>1,2\*</sup>

<sup>1</sup>Department of Molecular Biology, Massachusetts General Hospital, Boston, MA 02114

<sup>2</sup>Department of Genetics, Harvard Medical School, Boston, MA 02115

<sup>3</sup>Department of Human Genetics and Biochemistry, Sackler Faculty of Medicine, Tel Aviv University, Tel Aviv 69978, Israel.

<sup>4</sup>Department of Cell and Molecular Biology, Karolinska Institute, Stockholm, Sweden

## **Table of content**

**Supplementary Figure. 1: The TCA scheme**

**Supplementary Figure 2: The rank order of the 50 genes that are most correlated in the phylogenetic profile with the TCA gene *ACO2***

**Supplementary Figure 3: LHX3 and NKX2-1 Protein expression data across different tissues**

**Supplementary Figure 4: RBP-Jk is an MITF gene coregulator.**

**Supplementary Figure 5: Phylogenetic profiling of meiotic specific genes**

**Supplementary Table 1: The phylogenetic profile database.**

**Supplementary Table 2: *p*-values of MSigDB gene groups for the NPP with 86, 64, 43 and, 22 organisms and for BPP with 86 organisms.**

**Supplementary Table 3: Co10 scores, *p*-values, and *q*-values of HPO gene groups.**

**Supplementary Table 4: The overlap between the genes, which contribute to the Co10 score in pairs of Significant HPOs.**

**Supplementary Table 5: The mapping of the human genes into coevolved clusters.**

**Supplementary Table 6: Gene overlap between coevolved clusters and functional**

**Supplementary Table 7: Phylogenetic profile of the 50 genes that are mostly correlated with MITF.**

**Supplementary Table 8: Presence of RBP-Jk binding sites in MITF target gene promoters.**

**Supplementary Table 9: Primer and siRNA sequences.**

**Example of particular intersection of MSigDB and HPO clusters with phylogenetic clusters**

**Supplementary Figure. 1: The TCA scheme.**

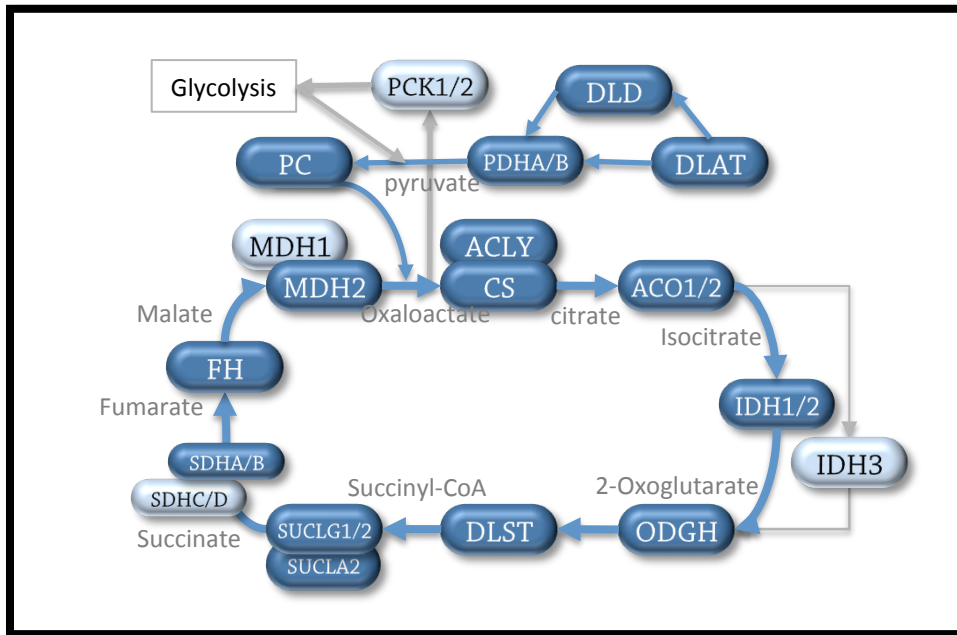

The blue ellipses represent genes that have homology across all or most of the organisms analyzed. The white ellipses represent genes that are conserved in particular clades of species but not others. Drawn based on KEGG (<http://www.genome.jp/kegg/>).

**Supplementary Figure 2: The rank order of the 50 genes that are most correlated in the phylogenetic profile with the TCA gene ACO2.**

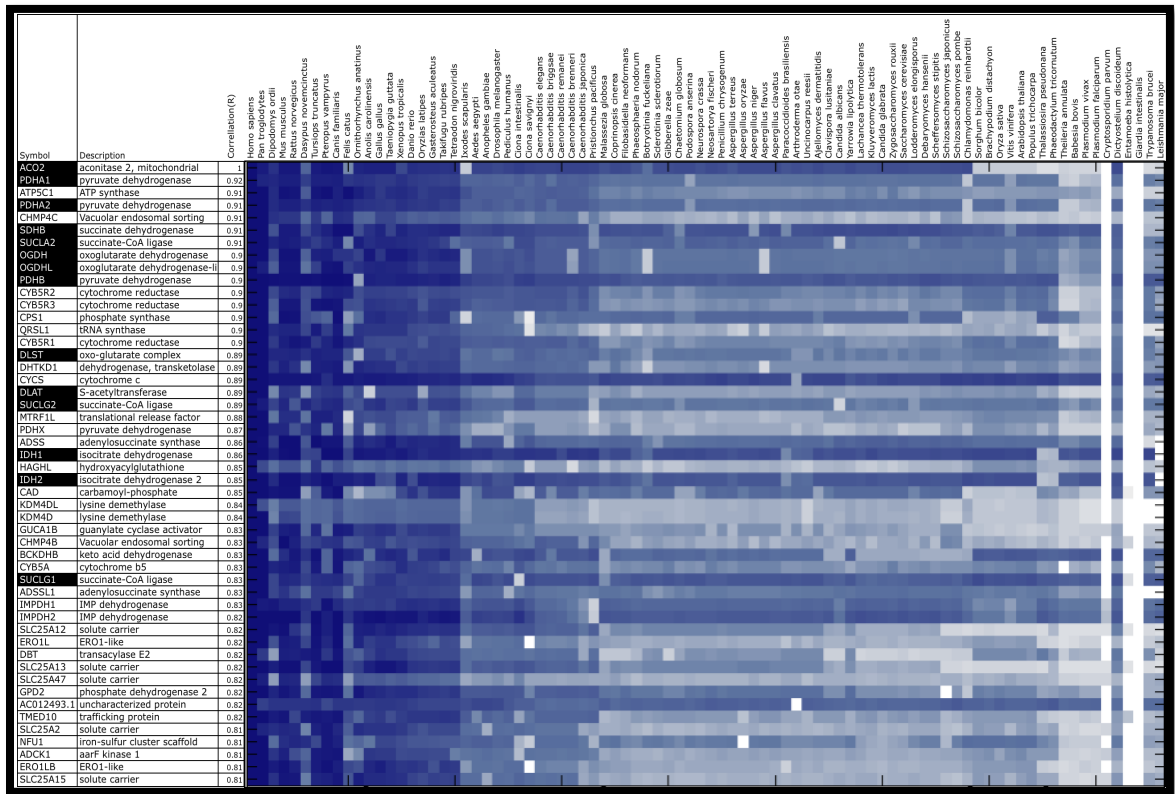

The genes in the black boxes are known to be part of the TCA cycle; the white-boxed genes are predicted to interact with the TCA cycle.

**Supplementary Figure 3: LHX3 and NKX2-1 Protein expression data across different tissues.**

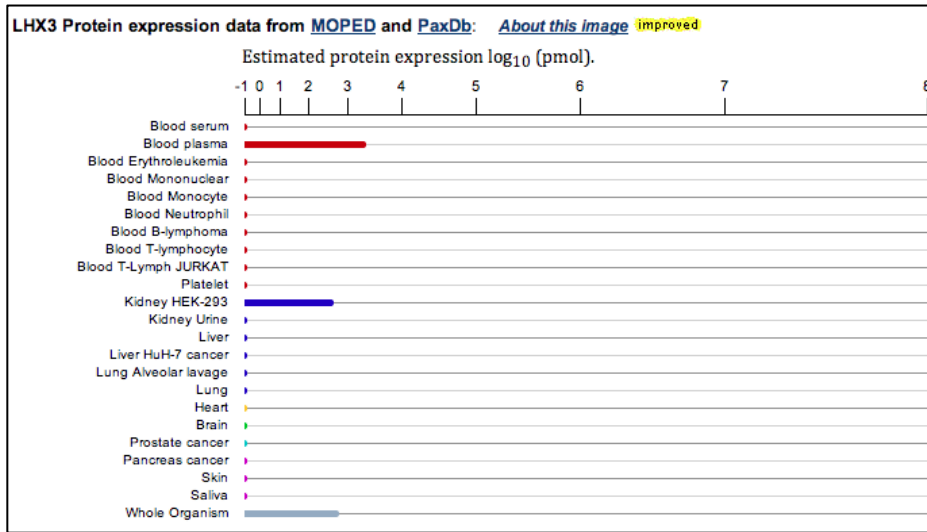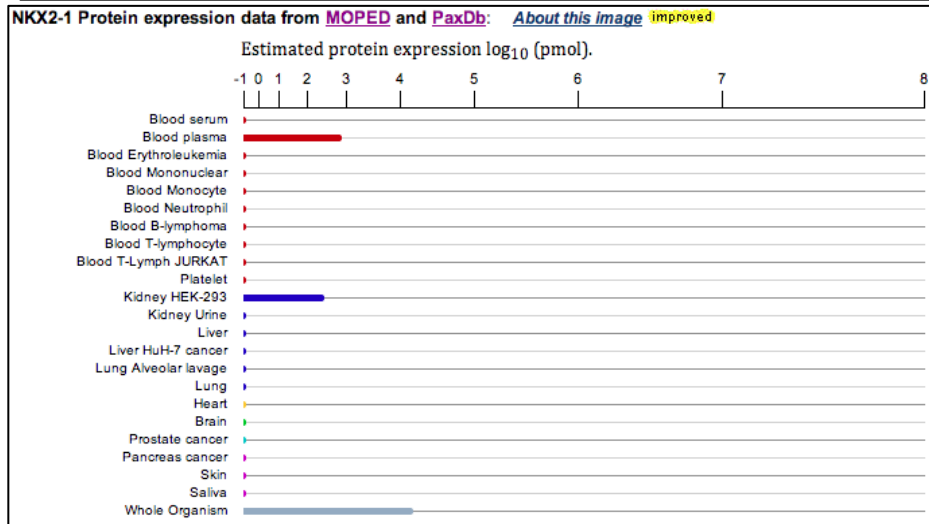

Images were obtained from the genecards website (<http://www.genecards.org/cgi-bin/carddisp.pl?gene=LHX3&search=lxh>). The images demonstrate the similarity between the expression profile of LHX3 and NKX2-1 proteins across different tissues and shows high expression in liver and plasma.

**Supplementary Figure. 4: RBP-Jk is an MITF gene coregulator.**

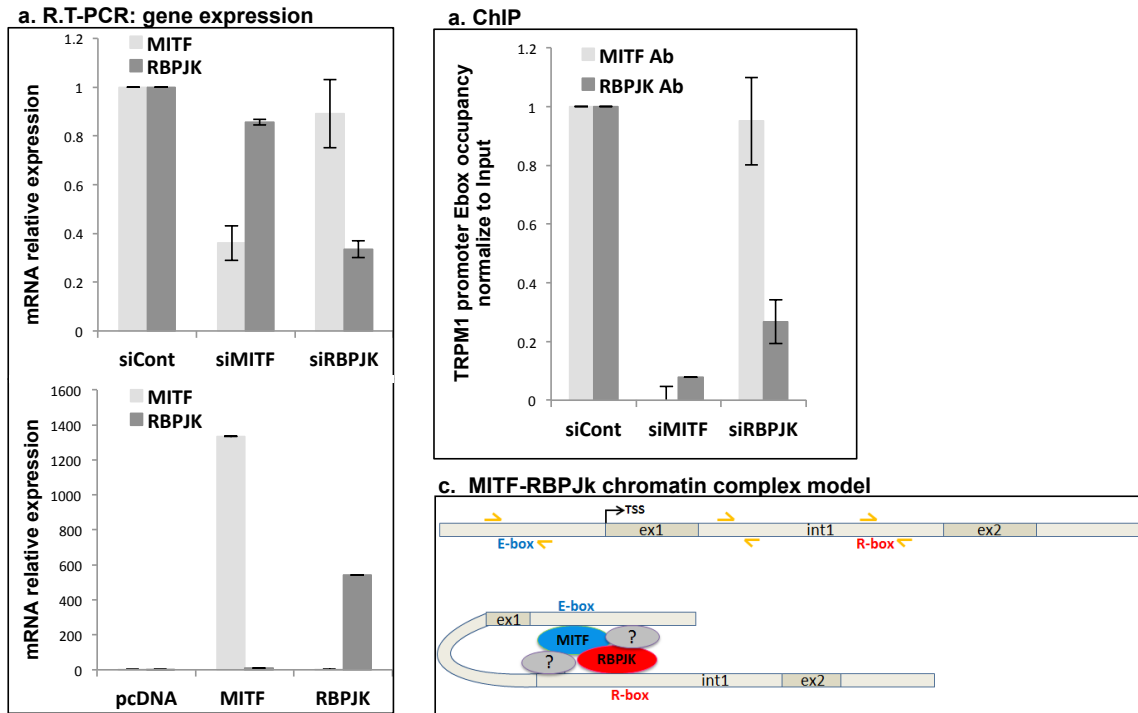

**a)** MITF and RBP-Jk mRNA levels were measured by RT-PCR. Primary human melanomas were transfected as indicated. MITF (dark blue bars) and RBP-Jk (light blue bars) mRNA levels were measured by qRT-PCR upon transfection, as indicated. Results are normalized to actin and are relative to siCont or empty vector respectively and represent mean  $\pm$ SD of 5 replicates. **b)** MITF and RBP-Jk ChIP on *TRPM1* locus was performed upon MITF or RBP-Jk depletion. PCR primers spanning the *TRPM1* locus were employed. **c)** Diagram of RBP-Jk and MITF complex on promoter. Upper panel: *TRPM1* promoter region including DNA binding site of MITF (E-box, red). RBP-Jk (R-box), exons (ex1, ex2), intron (int1), and transcription start site (TSS) are indicated. The E-box represents three binding sites, CATGTG, CATGTG, and CACATG, located at -2500 relative to TSS. R-box represents three binding sites, ATGGGAG, ATGGGAG, and TTCCCAC, located at +7900 relative to TSS. Lower panel: RBP-Jk and MITF protein-DNA complex on *TRPM1* promoter.

## Supplementary Figure. 5: Phylogenetic profiling of meiotic specific genes.

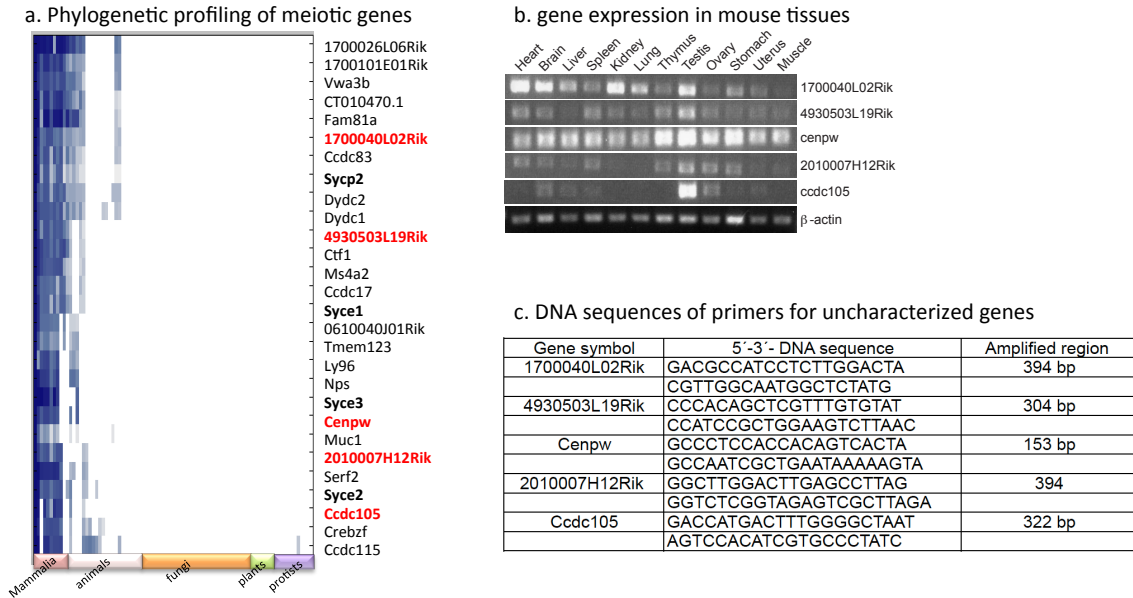

**a)** Meiosis-specific genes (synaptonemal complex genes: *Sycp2*, *Syce1*, *Syce2*, and *Syce3*, in bold) clustered based on their coevolution patterns across eukaryotic phyla with uncharacterized genes. Candidate meiotic-specific genes that were not annotated to function in meiosis or any other cellular process and were testes or ovary specific are indicated by red bold font. **b)** Expression patterns of uncharacterized genes in cDNA libraries from several mouse tissues. **c)** DNA sequences of primers used to amplify mRNA from genes in panel b.

**Supplementary Table 1: The phylogenetic profile database.** Each entry is Pab/Paa, when Pab is the best Blastp bit-score between a human gene 'a' and the top hit in organism 'b', Paa is the blast of the 'a' gene against itself. The result is a table of 19,017 genes by 86 species. **See excel file**

**Supplementary Table 2: *p*-values of MSigDB gene groups for the NPP with 86, 64, 43 and, 22 organisms and for BPP with 86 organisms.** The columns represent the data for MSigDB groups and the calculated by *p*-values. The *p*-values were calculated by generating 1,000,000 random sets at the same size as the curated MSigDB set, and Co10 scores were calculated for all the random sets. A *p*-value <  $1 \times 10^{-6}$  was obtained if the score of the curated sets was higher than any of the 1,000,000 random sets with

similar size. To avoid biases, the random sets were generated only from the genes found in the MSigDB database.

|                             |                                    | Number and percentage of significant co-evolved MSigDB groups in different methods |                    |     |                    |     |                    |     |                    |     |                    |                            |                    |     |                    |     |                    |     |                    |     |                    |    |
|-----------------------------|------------------------------------|------------------------------------------------------------------------------------|--------------------|-----|--------------------|-----|--------------------|-----|--------------------|-----|--------------------|----------------------------|--------------------|-----|--------------------|-----|--------------------|-----|--------------------|-----|--------------------|----|
|                             |                                    | q-values < 0.05                                                                    |                    |     |                    |     |                    |     |                    |     |                    | p-value < 10 <sup>-6</sup> |                    |     |                    |     |                    |     |                    |     |                    |    |
| Collections                 | Subcollections                     | # of groups                                                                        | NPP (86 Organisms) |     | NPP (64 Organisms) |     | NPP (43 Organisms) |     | NPP (22 Organisms) |     | BPP (86 Organisms) |                            | NPP (86 Organisms) |     | NPP (64 Organisms) |     | NPP (43 Organisms) |     | NPP (22 Organisms) |     | BPP (86 Organisms) |    |
| C1: positional gene sets    | positional gene sets               | 320                                                                                | 10                 | 3%  | 9                  | 3%  | 6                  | 2%  | 4                  | 1%  | 4                  | 1%                         | 2                  | 1%  | 3                  | 1%  | 1                  | 0%  | 1                  | 0%  | 0                  | 0% |
| C2: curated gene sets       | chemical and genetic perturbations | 2365                                                                               | 250                | 11% | 208                | 9%  | 193                | 8%  | 159                | 7%  | 33                 | 1%                         | 47                 | 2%  | 40                 | 2%  | 43                 | 2%  | 34                 | 1%  | 9                  | 0% |
|                             | BioCarta                           | 217                                                                                | 41                 | 19% | 34                 | 16% | 27                 | 12% | 7                  | 3%  | 8                  | 4%                         | 2                  | 1%  | 3                  | 1%  | 3                  | 1%  | 1                  | 0%  | 3                  | 1% |
|                             | KEGG                               | 186                                                                                | 98                 | 53% | 93                 | 50% | 85                 | 46% | 61                 | 33% | 22                 | 12%                        | 38                 | 20% | 34                 | 18% | 31                 | 17% | 24                 | 13% | 6                  | 3% |
|                             | REACTOME                           | 430                                                                                | 163                | 38% | 159                | 37% | 154                | 36% | 110                | 26% | 58                 | 13%                        | 67                 | 16% | 71                 | 17% | 60                 | 14% | 63                 | 15% | 23                 | 5% |
| C3: motif gene sets         | microRNA targets                   | 219                                                                                | 54                 | 25% | 41                 | 19% | 43                 | 20% | 20                 | 9%  | 0                  | 0%                         | 4                  | 2%  | 5                  | 2%  | 1                  | 0%  | 1                  | 0%  | 0                  | 0% |
|                             | transcription factor targets       | 584                                                                                | 143                | 24% | 135                | 23% | 89                 | 15% | 54                 | 9%  | 5                  | 1%                         | 6                  | 1%  | 6                  | 1%  | 2                  | 0%  | 4                  | 1%  | 0                  | 0% |
| C4: computational gene sets | cancer modules                     | 443                                                                                | 81                 | 18% | 77                 | 17% | 71                 | 16% | 76                 | 17% | 33                 | 7%                         | 25                 | 6%  | 23                 | 5%  | 23                 | 5%  | 27                 | 6%  | 8                  | 2% |
|                             | cancer gene neighborhoods          | 427                                                                                | 149                | 35% | 132                | 31% | 141                | 33% | 108                | 25% | 22                 | 5%                         | 48                 | 11% | 46                 | 11% | 51                 | 12% | 48                 | 11% | 9                  | 2% |
| C5: GO gene sets            | GO biological process              | 793                                                                                | 136                | 17% | 121                | 15% | 100                | 13% | 64                 | 8%  | 42                 | 5%                         | 38                 | 5%  | 28                 | 4%  | 30                 | 4%  | 16                 | 2%  | 7                  | 1% |
|                             | GO cellular component              | 215                                                                                | 50                 | 23% | 41                 | 19% | 43                 | 20% | 40                 | 19% | 9                  | 4%                         | 18                 | 8%  | 18                 | 8%  | 19                 | 9%  | 8                  | 4%  | 3                  | 1% |
|                             | GO molecular function              | 395                                                                                | 102                | 26% | 99                 | 25% | 93                 | 24% | 70                 | 18% | 38                 | 10%                        | 45                 | 11% | 37                 | 9%  | 40                 | 10% | 21                 | 5%  | 8                  | 2% |
|                             | TOTAL                              | 6594                                                                               | 1277               | 19% | 1149               | 17% | 1045               | 16% | 773                | 12% | 274                | 4%                         | 340                | 5%  | 314                | 5%  | 304                | 5%  | 248                | 4%  | 76                 | 1% |

See excel for the full data

**Supplementary Table 3: Co10 scores, p-values, and q-values of HPO gene groups.** The columns represent the data for HPO groups and the calculated by p-values and q-values. The p-values were calculated by generating 1,000,000 random sets at the same size as the curated HPO set, and Co10 scores were calculated for all the random sets. A p-value < 1x10<sup>-6</sup> was obtained if the score of the curated sets was higher than any of the 1,000,000 random sets with similar size. To avoid biases, the random sets were generated only from the genes found in the HPO database. See excel file

**Supplementary Table 4: The overlap between the genes, which contribute to the Co10 score in pairs of Significant HPOs.** The overlap between the HPOs was used to generate the HPO network (Figure. 4). See excel file

**Supplementary Table 5: The mapping of the human genes into coevolved clusters.** The 1076 phylogenetically clustered human genes, and the average phylogenetic profile of the genes in the cluster. Column A - the index identifier of the cluster. Column B – the list of genes in the cluster. Column C - the number of genes in the cluster. Column D to CK - the average phylogenetic protein conservation of the genes in the cluster across 86 genomes. See excel file

**Supplementary Table 6: Gene overlap between coevolved clusters and functional groups.** The functional gene groups and disease phenotypic groups (columns A-B), their size (column C) and the overlap statistic (column F to H) between these groups and the 1076 phylogenetic clusters (column D) that indexes in Supplementary Table 5. To

eliminate the effect of homologous gene families, the over-representation p-values and FDR (columns L-M) were also calculated using the number of protein families in the functional groups (column I), disease phenotypic groups (column j), and in the overlap (column K) instated of all the genes in each group. **See excel file**

**Supplementary Table 7: Phylogenetic profile of the 50 genes that are mostly correlated with MITF.** The correlation coefficients were calculated using the normalized phylogenetic profile matrix and the genes are rank ordered. Each row represents a gene and each entry is Pab/Paa, when Pab is the best Blastp bit-score between a human gene 'a' and the top hit in organism 'b', Paa is the blast of the 'a' gene against itself. **See excel file**

**Supplementary Table 8: Presence of RBP-Jk binding sites in MITF target gene promoters.**

| Gene Name | RBP-Jk BS |
|-----------|-----------|
| PMEL      | Yes       |
| TYRP1     | No        |
| TYR       | Yes       |
| TBX2      | Yes       |
| C-MET     | Yes       |
| MART1     | No        |
| DCT       | Yes       |
| CDKN1A    | Yes       |
| CDK2      | Yes       |
| BCL2      | No        |
| AIM1      | Yes       |
| DICER1    | Yes       |
| TRPM1     | Yes       |

**Supplementary Table 9: Primer and siRNA sequences.**

**siRNA**

| reagent          | sequence                                                                                                                                                                                                                                   | company                                                                       |
|------------------|--------------------------------------------------------------------------------------------------------------------------------------------------------------------------------------------------------------------------------------------|-------------------------------------------------------------------------------|
| si control       | sense 5' AAUUCUCCGAACGUGUCACGU 3'<br>antisense 5' ACGUGACACGUUCGGAGAAUU 3'                                                                                                                                                                 | ABI Inc.                                                                      |
| si MITF #1       | sense 5' GGCUUUCUAGAAAGAAUAA 3'<br>antisense 5' UUAUUCUUUCUAGAAAGCC 3'                                                                                                                                                                     | ABI Inc.                                                                      |
| si MITF #2       | sense 5' GGUGAAUCGGAUCAUCAAG 3'<br>antisense 5' CUUGAUGAUCCGAUUCACC 3'                                                                                                                                                                     | designed by Carreira et al, <i>Nature</i> 2005<br>and purchased from ABI Inc. |
| TriFECTa siRBPJk | duplex 1 5' GGCUGGAAUACAAGUUGAACAACT 3'<br>3' CACCGACCUU AUGUUCACUUGUUUGA 5'<br>duplex 2 5' CCAAGGAACUUGUAUUGUAUAAG 3'<br>3' CUGGUUCCUUGAACAUUAACAUAUUC 5'<br>duplex 3 5' CACAGUAAGGCAGAGUAUACAUTT 3'<br>3' UCGUGUCUAUCCGUCUCAU AUGUAAA 5' | IDT                                                                           |



### **Primers - RT-PCR**

| <b>primer name</b> | <b>sequence</b>                         |
|--------------------|-----------------------------------------|
| h-mMITF            | Forward 5' CATTGTTATGCTGGAAATGCTAGAA 3' |
|                    | Reverse 5' GGCTTGCTGTATGTGGTACTTGG 3'   |
| hActin             | Forward 5' ATTGCCGACAGGATGCAGAA 3'      |
|                    | Reverse 5' GCTGATCCACATCTGCTGGAA 3'     |
| PZLF2              | Forward 5' ATGGTCCGGCTCTCTGACTTC 3'     |
|                    | Reverse 5' TGAAGACGGAGATGATGCAGG 3'     |
| Hes5               | Forward 5' GTCAACACGACACCGGATAAA 3'     |
|                    | Reverse 5' TCAGCTGGCTCAGACTTCA 3'       |
| TRPM1              | Forward 5' TCTTGAATCCAGGGTGGCGGATA 3'   |
|                    | Reverse 5' GTTCCAGCTGCCAATCTTTCACCA 3'  |

### **Primers - ChIP**

| <b>primer name</b> | <b>sequence</b>                          |
|--------------------|------------------------------------------|
| HES1 promtor       | Reverse 5' GGACACACACACACACACACCC 3'     |
|                    | Reverse 5' CCGGGAGAAGCCAAGAAGGTAAAT 3'   |
| TPRM1 pro Ebox1    | Forward 5' ACAGCAAATCCAACAGAGCTCCCA 3'   |
|                    | Reverse 5' ACAGCAAATCCAACAGAGCTCCCA 3'   |
| TPRM1 pro Ebox2    | Forward 5' GTAATTAGTGCCATGTGCCGCCTT 3'   |
|                    | Reverse 5' TGGCTGGAAATGTCAGCAGGGTTT 3'   |
| TPRM1 pro Ebox3    | Forward 5' CATCGCTTCACAGCAATCATGAGG 3'   |
|                    | Reverse 5' ATCTGAGCTTACCTGCCACAGCA 3'    |
| TRPM1 int1_A       | Forward 5' TGTGTGTAATGCTGGACCTGGGA 3'    |
|                    | Reverse 5' ACTGAGGGCAACATGTCTCTTGCT 3'   |
| TRPM1 int1_B       | Forward 5' AATGCTGGACCTGGGAAGATGGAA 3'   |
|                    | Reverse 5' ACTGAGGGCAACATGTCTCTTGCT 3'   |
| TRPM1pro Rbox      | Forward 5' AGCAAAGGACAGAGAACATCGGGA 3'   |
|                    | Reverse 5' CAGCAGTTGGGAAGGTGTTGTGTT 3'   |
| TRPM1 ex2          | Forward 5' CGGGAATGTATCTTTGTAATCCTAGC 3' |
|                    | Reverse 5' TCTGGACTCCTCTTTCTGCCTCTT 3'   |
| TRPM1 ex4          | Forward 5' CAGGCAGTTCTTGCTTGGACATGA 3'   |
|                    | Reverse 5' GTTCCAGCTGCCAATCTTTCACCA 3'   |
| TRPM1 ex5          | Forward 5' TTGTGCTTGCTTCCCTGTTGGTC 3'    |
|                    | Reverse 5' TGTGGGAGTTGTTGAGCACAGAGA 3'   |
| TRPM1 ex9          | Forward 5' TGTGTTTCAGAATGGGTTCTGAGGG 3'  |
|                    | Reverse 5' TCTAGCACCAGCAGACATAGTCCA 3'   |
| bACTpromotor       | Forward 5' CCCACCTCACCCTCTTCTATTT 3'     |
|                    | Reverse 5' TCAGCCTAGAGGAACCTGCCTT 3'     |
| bACTpromotor2      | Forward 5' GGAGTGTGGTCCCTGCGACTTCTAA 3'  |
|                    | Reverse 5' TAGCTAAATGTGCTGGGTGGGTCA 3'   |
| bACT ex2           | Forward 5' TCACCATGGATGATGATATCGCCG 3'   |
|                    | Reverse 5' TCCTGTGCAGAGAAAGCGCC 3'       |
| bACT ex4           | Forward 5' AGCCGTGTTCTTTGCACTTCTGC 3'    |
|                    | Reverse 5' TAGCACAGCCTGGATAGCAACGTA 3'   |
| bACT ex6           | Forward 5' AATGTGGCCGAGGACTTTGATTGC 3'   |
|                    | Reverse 5' AGGATGGCAAGGGACTTCTGTAA 3'    |
